# Supplementary material for: A self-cleaning polyacrylonitrile fiber membrane modified by photocatalytic nanoparticles and zwitterionic polymer brushes for oil/water separation
Source: Royal Society of Chemistry journal article supplement (doi:10.1039/d3nj05340g), 2024-01-01
Supplement: d3nj05340g1.pdf [file d3nj05340g1.pdf]

**A self-cleaning polyacrylonitrile fiber membrane modified  
by photocatalytic nanoparticles and zwitterionic polymer  
brush for oil/water separation**

Yanming Shao\*, Jun An, Caifeng Hao, Zhizhen Zhao, Mengyi Kang, Huanhuan Zhao,  
Xuan Rong, Min Zhao\*

*College of Chemistry and Chemical Engineering, Key Laboratory of Auxiliary Chemistry and  
Technology for Chemical Industry, Ministry of Education, Shaanxi Key Laboratory of Chemical  
Additives for Industry, Shaanxi University of Science and Technology, Xi'an, Shaanxi 710021,  
People's Republic of China*

---

\*Corresponding author. E-mail: [shaoyanming@sust.edu.cn](mailto:shaoyanming@sust.edu.cn)

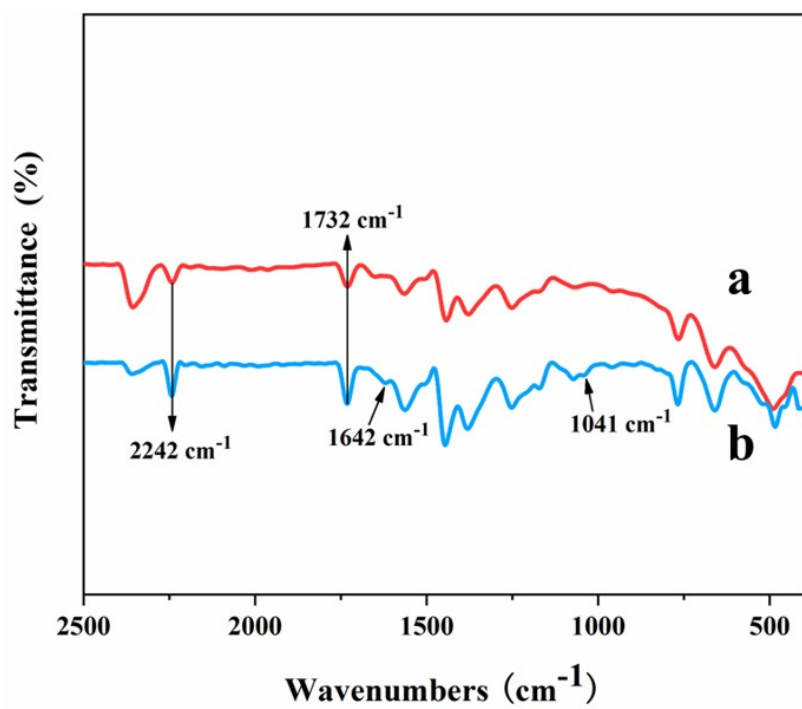

**Fig. S1** ATR-FTIR spectra of the PAU membrane (a) and PAUS membrane (b).
